# Supplementary material for: Fibroblast Growth Factor 1 Promotes Rat Stem Leydig Cell Development
Source: PubMed Central journal article supplement (PMC6418010; doi:10.3389/fendo.2019.00118), 2019-03-08

**FigureS2**

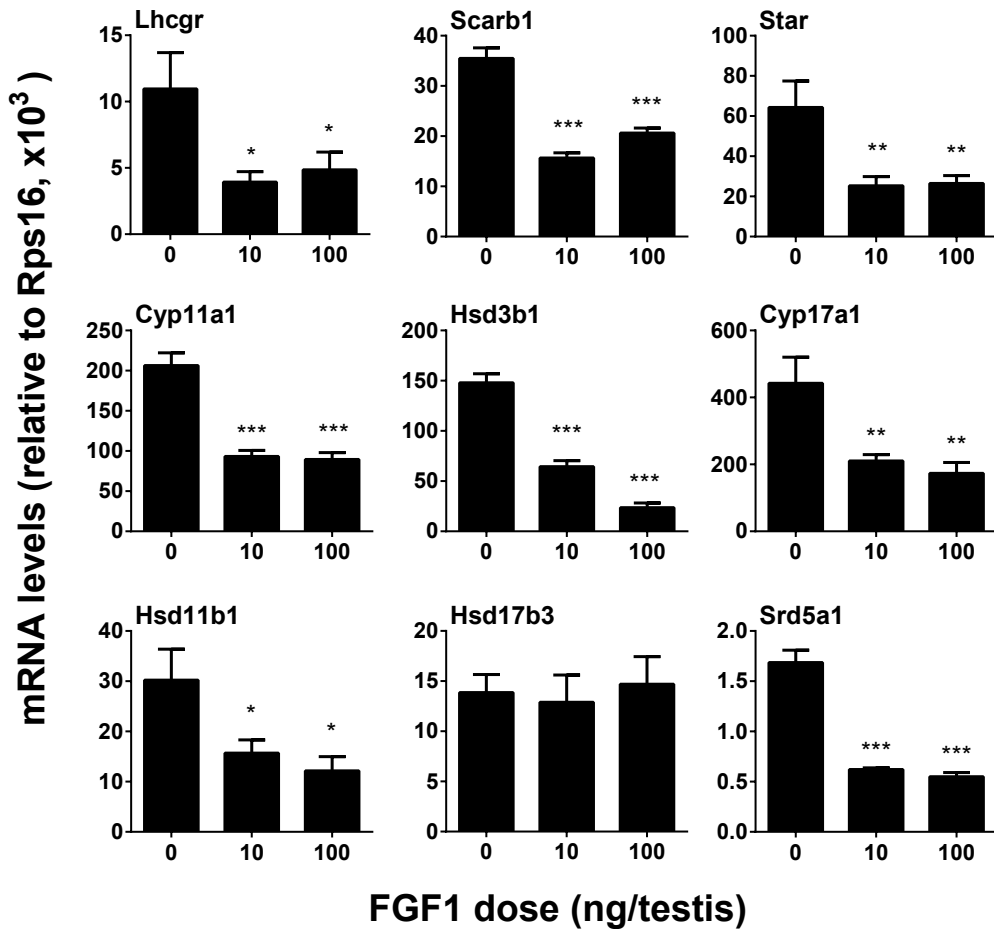

Supplement: Image_2.pdf [file Image_2.pdf]
