# Supplementary material for: Fibroblast Growth Factor 1 Promotes Rat Stem Leydig Cell Development
Source: PubMed Central journal article supplement (PMC6418010; doi:10.3389/fendo.2019.00118), 2019-03-08

FigureS3

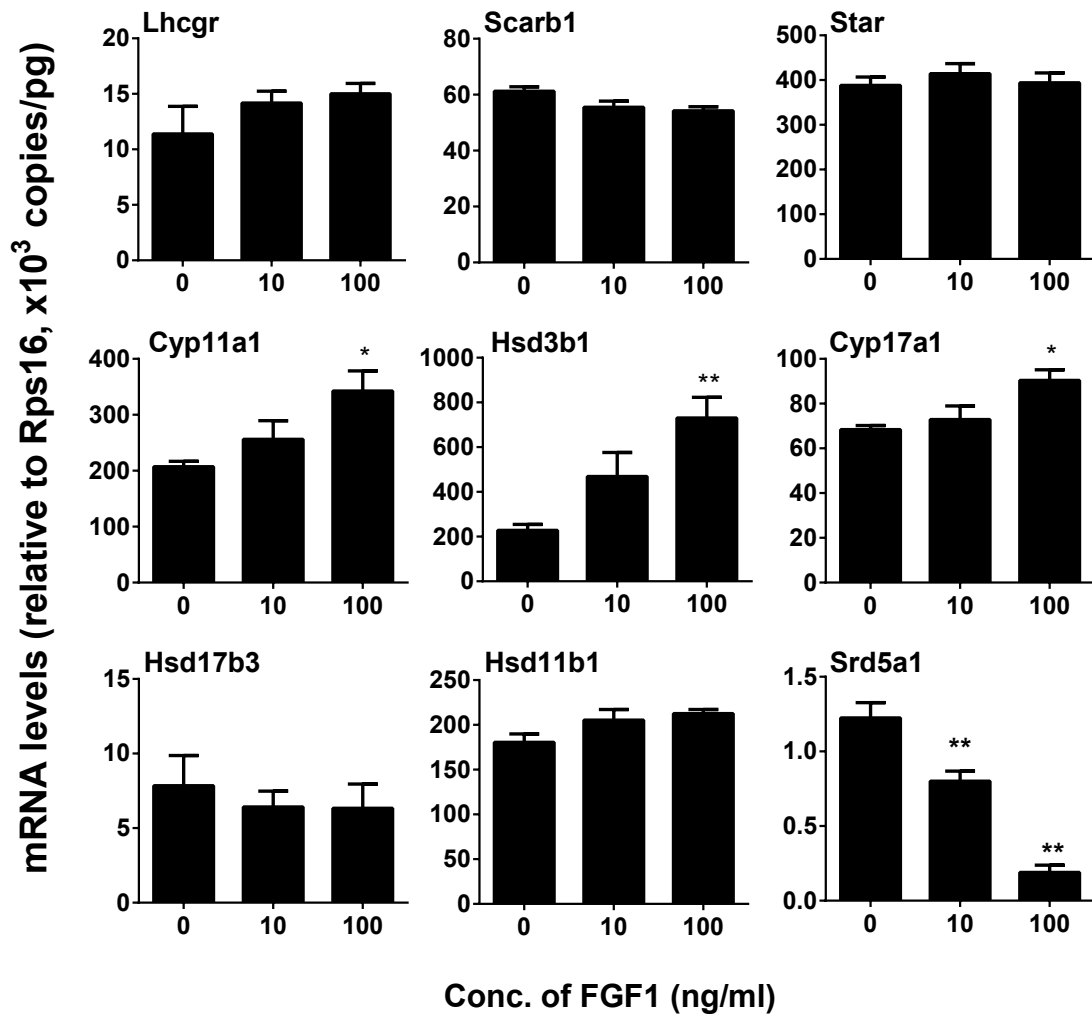

Supplement: Image_3.pdf [file Image_3.pdf]
